# Supplementary material
Source: publisher figshare collection journal article supplement (https://future-science-group.figshare.com/ndownloader/files/28532838)
Supplement: Supplementary file 1 [file 28532838]

Table S1. GO analysis of MTFR2 co-expressed genes.

| Ontology | Type | Description | Count | P |
| --- | --- | --- | --- | --- |
| BP | GO:0007059 | chromosome segregation | 97 | 1.07E-50 |
| BP | GO:0006260 | DNA replication | 93 | 2.22E-49 |
| BP | GO:0000819 | sister chromatid segregation | 70 | 2.43E-44 |
| BP | GO:0000280 | nuclear division | 102 | 2.44E-44 |
| BP | GO:0140014 | mitotic nuclear division | 84 | 2.44E-44 |
| BP | GO:0048285 | organelle fission | 104 | 9.00E-42 |
| BP | GO:0098813 | nuclear chromosome segregation | 78 | 3.71E-41 |
| BP | GO:0000070 | mitotic sister chromatid segregation | 62 | 3.81E-41 |
| BP | GO:0006397 | mRNA processing | 107 | 2.60E-34 |
| BP | GO:1901990 | regulation of mitotic cell cycle phase transition | 98 | 8.49E-34 |
| BP | GO:0008380 | RNA splicing | 99 | 1.62E-33 |
| BP | GO:1901987 | regulation of cell cycle phase transition | 101 | 5.81E-33 |
| BP | GO:0000075 | cell cycle checkpoint | 64 | 4.41E-31 |
| BP | GO:0000375 | RNA splicing, via transesterification reactions | 84 | 1.36E-30 |
| BP | GO:0000377 | RNA splicing, via transesterification reactions  with bulged adenosine as nucleophile | 83 | 2.99E-30 |
| BP | GO:0000398 | mRNA splicing, via spliceosome | 83 | 2.99E-30 |
| BP | GO:0006261 | DNA-dependent DNA replication | 52 | 2.99E-30 |
| BP | GO:0006403 | RNA localization | 64 | 1.18E-29 |
| BP | GO:0033044 | regulation of chromosome organization | 78 | 1.23E-29 |
| BP | GO:0000226 | microtubule cytoskeleton organization | 94 | 1.87E-28 |
| BP | GO:0007051 | spindle organization | 53 | 2.84E-28 |
| BP | GO:0071103 | DNA conformation change | 72 | 3.71E-28 |
| BP | GO:0000723 | telomere maintenance | 54 | 3.71E-28 |
| BP | GO:0032200 | telomere organization | 55 | 4.07E-27 |
| BP | GO:0051983 | regulation of chromosome segregation | 42 | 5.66E-27 |
| BP | GO:1902850 | microtubule cytoskeleton organization  involved in mitosis | 46 | 1.32E-26 |
| BP | GO:0006405 | RNA export from nucleus | 47 | 1.48E-26 |
| BP | GO:0044839 | cell cycle G2/M phase transition | 66 | 1.14E-25 |
| BP | GO:0007093 | mitotic cell cycle checkpoint | 50 | 2.22E-25 |
| BP | GO:0051052 | regulation of DNA metabolic process | 82 | 1.19E-24 |
| BP | GO:0000082 | G1/S transition of mitotic cell cycle | 66 | 1.79E-24 |
| BP | GO:0000086 | G2/M transition of mitotic cell cycle | 62 | 1.79E-24 |
| BP | GO:0044843 | cell cycle G1/S phase transition | 68 | 3.23E-24 |
| BP | GO:0050657 | nucleic acid transport | 53 | 4.05E-24 |
| BP | GO:0050658 | RNA transport | 53 | 4.05E-24 |
| BP | GO:0090068 | positive regulation of cell cycle process | 67 | 5.90E-24 |
| BP | GO:0051236 | establishment of RNA localization | 53 | 9.51E-24 |
| BP | GO:0071426 | ribonucleoprotein complex export from nucleus | 43 | 1.46E-23 |
| BP | GO:0071166 | ribonucleoprotein complex localization | 43 | 2.14E-23 |
| BP | GO:0051168 | nuclear export | 52 | 2.87E-23 |
| BP | GO:0007088 | regulation of mitotic nuclear division | 48 | 3.90E-23 |
| BP | GO:0006406 | mRNA export from nucleus | 40 | 4.42E-22 |
| BP | GO:0071427 | mRNA-containing ribonucleoprotein  complex export from nucleus | 40 | 4.42E-22 |
| BP | GO:0051169 | nuclear transport | 67 | 4.70E-22 |
| BP | GO:0051783 | regulation of nuclear division | 50 | 4.87E-22 |
| BP | GO:0033045 | regulation of sister chromatid segregation | 33 | 5.22E-22 |
| BP | GO:0010948 | negative regulation of cell cycle process | 71 | 9.42E-22 |
| BP | GO:0045787 | positive regulation of cell cycle | 74 | 1.26E-21 |
| BP | GO:0006913 | nucleocytoplasmic transport | 66 | 1.26E-21 |
| BP | GO:0006611 | protein export from nucleus | 48 | 1.91E-21 |
| BP | GO:0072331 | signal transduction by p53 class mediator | 61 | 2.81E-21 |
| BP | GO:0006323 | DNA packaging | 52 | 3.34E-21 |
| BP | GO:0007052 | mitotic spindle organization | 37 | 3.35E-21 |
| BP | GO:0031570 | DNA integrity checkpoint | 44 | 9.12E-21 |
| BP | GO:0051054 | positive regulation of DNA metabolic process | 55 | 1.08E-20 |
| BP | GO:0006310 | DNA recombination | 57 | 4.02E-20 |
| BP | GO:0051028 | mRNA transport | 44 | 4.15E-20 |
| BP | GO:0015931 | nucleobase-containing compound transport | 54 | 5.08E-20 |
| BP | GO:0043044 | ATP-dependent chromatin remodeling | 32 | 2.44E-19 |
| BP | GO:0031503 | protein-containing complex localization | 55 | 3.48E-19 |
| BP | GO:0045930 | negative regulation of mitotic cell cycle | 63 | 4.24E-19 |
| BP | GO:0071897 | DNA biosynthetic process | 49 | 5.17E-19 |
| BP | GO:0034502 | protein localization to chromosome | 32 | 2.29E-18 |
| BP | GO:0033047 | regulation of mitotic sister chromatid segregation | 27 | 4.10E-18 |
| BP | GO:0044786 | cell cycle DNA replication | 27 | 4.10E-18 |
| BP | GO:1902749 | regulation of cell cycle G2/M phase transition | 49 | 5.07E-18 |
| BP | GO:0051225 | spindle assembly | 33 | 5.47E-18 |
| BP | GO:0006302 | double-strand break repair | 50 | 6.10E-18 |
| BP | GO:0000077 | DNA damage checkpoint | 39 | 2.24E-17 |
| BP | GO:0010389 | regulation of G2/M transition of mitotic cell cycle | 46 | 2.24E-17 |
| BP | GO:1901988 | negative regulation of cell cycle phase transition | 54 | 3.88E-17 |
| BP | GO:0007091 | metaphase/anaphase transition of mitotic cell cycle | 24 | 4.35E-17 |
| BP | GO:0010965 | regulation of mitotic sister chromatid separation | 24 | 4.35E-17 |
| BP | GO:0033260 | nuclear DNA replication | 24 | 4.35E-17 |
| BP | GO:2001251 | negative regulation of chromosome organization | 37 | 1.19E-16 |
| BP | GO:1901991 | negative regulation of mitotic cell cycle  phase transition | 51 | 1.37E-16 |
| BP | GO:0044784 | metaphase/anaphase transition of cell cycle | 24 | 1.46E-16 |
| BP | GO:0051306 | mitotic sister chromatid separation | 24 | 1.46E-16 |
| BP | GO:0043486 | histone exchange | 25 | 2.82E-16 |
| BP | GO:2001252 | positive regulation of chromosome organization | 42 | 7.12E-16 |
| BP | GO:1905818 | regulation of chromosome separation | 24 | 8.16E-16 |
| BP | GO:0051304 | chromosome separation | 27 | 9.04E-16 |
| BP | GO:0007098 | centrosome cycle | 34 | 1.08E-15 |
| BP | GO:0071824 | protein-DNA complex subunit organization | 50 | 1.62E-15 |
| BP | GO:0031023 | microtubule organizing center organization | 35 | 2.62E-15 |
| BP | GO:0031124 | mRNA 3'-end processing | 30 | 3.06E-15 |
| BP | GO:0000725 | recombinational repair | 33 | 3.35E-15 |
| BP | GO:2000573 | positive regulation of DNA biosynthetic process | 26 | 4.19E-15 |
| BP | GO:1901796 | regulation of signal transduction by  p53 class mediator | 42 | 6.06E-15 |
| BP | GO:0044766 | multi-organism transport | 27 | 6.92E-15 |
| BP | GO:1902579 | multi-organism localization | 27 | 6.92E-15 |
| BP | GO:0034728 | nucleosome organization | 40 | 9.33E-15 |
| BP | GO:0018205 | peptidyl-lysine modification | 63 | 9.61E-15 |
| BP | GO:0031123 | RNA 3'-end processing | 32 | 1.36E-14 |
| BP | GO:0006336 | DNA replication-independent nucleosome assembly | 23 | 1.77E-14 |
| BP | GO:0034724 | DNA replication-independent nucleosome organization | 23 | 1.77E-14 |
| BP | GO:0000724 | double-strand break repair via homologous recombination | 32 | 1.78E-14 |
| BP | GO:0006333 | chromatin assembly or disassembly | 41 | 2.54E-14 |
| BP | GO:0034508 | centromere complex assembly | 23 | 2.84E-14 |
| BP | GO:0030071 | regulation of mitotic metaphase/anaphase transition | 21 | 2.94E-14 |
| BP | GO:0032201 | telomere maintenance via semi-conservative replication | 17 | 3.28E-14 |
| BP | GO:0006338 | chromatin remodeling | 38 | 4.02E-14 |
| BP | GO:2000278 | regulation of DNA biosynthetic process | 31 | 7.27E-14 |
| BP | GO:0065004 | protein-DNA complex assembly | 44 | 8.52E-14 |
| BP | GO:0031055 | chromatin remodeling at centromere | 21 | 8.64E-14 |
| BP | GO:1902099 | regulation of metaphase/anaphase transition of cell cycle | 21 | 8.64E-14 |
| BP | GO:0034080 | CENP-A containing nucleosome assembly | 20 | 1.42E-13 |
| BP | GO:0061641 | CENP-A containing chromatin organization | 20 | 1.42E-13 |
| BP | GO:0097711 | ciliary basal body-plasma membrane docking | 29 | 1.58E-13 |
| BP | GO:0008608 | attachment of spindle microtubules to kinetochore | 17 | 1.68E-13 |
| BP | GO:0016569 | covalent chromatin modification | 66 | 1.88E-13 |
| BP | GO:0022613 | ribonucleoprotein complex biogenesis | 61 | 2.12E-13 |
| BP | GO:0006334 | nucleosome assembly | 34 | 4.05E-13 |
| BP | GO:0051310 | metaphase plate congression | 22 | 5.18E-13 |
| BP | GO:0010833 | telomere maintenance via telomere lengthening | 26 | 5.21E-13 |
| BP | GO:0051321 | meiotic cell cycle | 42 | 5.28E-13 |
| BP | GO:0072401 | signal transduction involved in DNA integrity checkpoint | 25 | 5.70E-13 |
| BP | GO:0072422 | signal transduction involved in DNA damage checkpoint | 25 | 5.70E-13 |
| BP | GO:0036297 | interstrand cross-link repair | 21 | 6.10E-13 |
| BP | GO:0031497 | chromatin assembly | 36 | 6.18E-13 |
| BP | GO:0072395 | signal transduction involved in cell cycle checkpoint | 25 | 7.98E-13 |
| BP | GO:0097064 | ncRNA export from nucleus | 18 | 1.01E-12 |
| BP | GO:0045841 | negative regulation of mitotic metaphase/anaphase transition | 17 | 1.40E-12 |
| BP | GO:2000816 | negative regulation of mitotic sister chromatid separation | 17 | 1.40E-12 |
| BP | GO:0016570 | histone modification | 63 | 1.52E-12 |
| BP | GO:0033046 | negative regulation of sister chromatid segregation | 18 | 1.82E-12 |
| BP | GO:0044774 | mitotic DNA integrity checkpoint | 27 | 1.93E-12 |
| BP | GO:0006409 | tRNA export from nucleus | 17 | 2.57E-12 |
| BP | GO:0051031 | tRNA transport | 17 | 2.57E-12 |
| BP | GO:0071431 | tRNA-containing ribonucleoprotein complex export from nucleus | 17 | 2.57E-12 |
| BP | GO:1902100 | negative regulation of metaphase/anaphase transition of cell cycle | 17 | 2.57E-12 |
| BP | GO:1905819 | negative regulation of chromosome separation | 17 | 2.57E-12 |
| BP | GO:0051985 | negative regulation of chromosome segregation | 18 | 3.11E-12 |
| BP | GO:0070507 | regulation of microtubule cytoskeleton organization | 37 | 3.26E-12 |
| BP | GO:0050000 | chromosome localization | 24 | 3.29E-12 |
| BP | GO:0051303 | establishment of chromosome localization | 24 | 3.29E-12 |
| BP | GO:0032204 | regulation of telomere maintenance | 25 | 3.90E-12 |
| BP | GO:0044773 | mitotic DNA damage checkpoint | 26 | 4.24E-12 |
| BP | GO:0007004 | telomere maintenance via telomerase | 23 | 5.12E-12 |
| BP | GO:1903311 | regulation of mRNA metabolic process | 48 | 5.34E-12 |
| BP | GO:0006270 | DNA replication initiation | 16 | 6.23E-12 |
| BP | GO:0007094 | mitotic spindle assembly checkpoint | 16 | 6.23E-12 |
| BP | GO:0031577 | spindle checkpoint | 16 | 6.23E-12 |
| BP | GO:0071173 | spindle assembly checkpoint | 16 | 6.23E-12 |
| BP | GO:0071174 | mitotic spindle checkpoint | 16 | 6.23E-12 |
| BP | GO:0045839 | negative regulation of mitotic nuclear division | 19 | 7.86E-12 |
| BP | GO:0033048 | negative regulation of mitotic sister chromatid segregation | 17 | 8.12E-12 |
| BP | GO:0031571 | mitotic G1 DNA damage checkpoint | 22 | 1.07E-11 |
| BP | GO:0044819 | mitotic G1/S transition checkpoint | 22 | 1.07E-11 |
| BP | GO:0075733 | intracellular transport of virus | 21 | 1.08E-11 |
| BP | GO:0007080 | mitotic metaphase plate congression | 18 | 1.42E-11 |
| BP | GO:0051784 | negative regulation of nuclear division | 20 | 1.49E-11 |
| BP | GO:0044783 | G1 DNA damage checkpoint | 22 | 1.51E-11 |
| BP | GO:0032210 | regulation of telomere maintenance via telomerase | 20 | 2.25E-11 |
| BP | GO:0050684 | regulation of mRNA processing | 28 | 3.02E-11 |
| BP | GO:0046794 | transport of virus | 21 | 3.33E-11 |
| BP | GO:0000380 | alternative mRNA splicing, via spliceosome | 20 | 3.33E-11 |
| BP | GO:1904356 | regulation of telomere maintenance via telomere lengthening | 21 | 4.77E-11 |
| BP | GO:0006278 | RNA-dependent DNA biosynthetic process | 23 | 4.89E-11 |
| BP | GO:1903046 | meiotic cell cycle process | 33 | 5.19E-11 |
| BP | GO:0006977 | DNA damage response, signal transduction by p53 class mediator resulting in cell cycle arrest | 20 | 7.17E-11 |
| BP | GO:0032886 | regulation of microtubule-based process | 38 | 9.27E-11 |
| BP | GO:0032206 | positive regulation of telomere maintenance | 19 | 1.02E-10 |
| BP | GO:0072431 | signal transduction involved in mitotic G1 DNA damage checkpoint | 20 | 1.02E-10 |
| BP | GO:1902400 | intracellular signal transduction involved in G1 DNA damage checkpoint | 20 | 1.02E-10 |
| BP | GO:0090307 | mitotic spindle assembly | 19 | 1.52E-10 |
| BP | GO:0034660 | ncRNA metabolic process | 63 | 1.87E-10 |
| BP | GO:0140056 | organelle localization by membrane tethering | 31 | 1.95E-10 |
| BP | GO:0032392 | DNA geometric change | 24 | 2.04E-10 |
| BP | GO:0072413 | signal transduction involved in mitotic cell cycle checkpoint | 20 | 2.05E-10 |
| BP | GO:1902402 | signal transduction involved in mitotic DNA damage checkpoint | 20 | 2.05E-10 |
| BP | GO:1902403 | signal transduction involved in mitotic DNA integrity checkpoint | 20 | 2.05E-10 |
| BP | GO:0140013 | meiotic nuclear division | 31 | 2.30E-10 |
| BP | GO:0006275 | regulation of DNA replication | 26 | 2.62E-10 |
| BP | GO:1904358 | positive regulation of telomere maintenance via telomere lengthening | 16 | 3.22E-10 |
| BP | GO:0030261 | chromosome condensation | 15 | 3.31E-10 |
| BP | GO:0031145 | anaphase-promoting complex-dependent catabolic process | 23 | 3.56E-10 |
| BP | GO:0048024 | regulation of mRNA splicing, via spliceosome | 22 | 4.80E-10 |
| BP | GO:0060249 | anatomical structure homeostasis | 57 | 5.54E-10 |
| BP | GO:0000281 | mitotic cytokinesis | 21 | 6.17E-10 |
| BP | GO:0022616 | DNA strand elongation | 11 | 6.17E-10 |
| BP | GO:0051984 | positive regulation of chromosome segregation | 13 | 7.05E-10 |
| BP | GO:0042770 | signal transduction in response to DNA damage | 29 | 7.05E-10 |
| BP | GO:0051383 | kinetochore organization | 12 | 7.87E-10 |
| BP | GO:0000083 | regulation of transcription involved in G1/S transition of mitotic cell cycle | 14 | 9.21E-10 |
| BP | GO:0032212 | positive regulation of telomere maintenance via telomerase | 15 | 9.31E-10 |
| BP | GO:0022406 | membrane docking | 31 | 9.52E-10 |
| BP | GO:0010639 | negative regulation of organelle organization | 51 | 1.02E-09 |
| BP | GO:0045931 | positive regulation of mitotic cell cycle | 31 | 1.91E-09 |
| BP | GO:0034470 | ncRNA processing | 45 | 2.01E-09 |
| BP | GO:0051973 | positive regulation of telomerase activity | 15 | 2.46E-09 |
| BP | GO:0046605 | regulation of centrosome cycle | 18 | 2.79E-09 |
| BP | GO:0090329 | regulation of DNA-dependent DNA replication | 17 | 3.02E-09 |
| BP | GO:0061640 | cytoskeleton-dependent cytokinesis | 22 | 3.03E-09 |
| BP | GO:0071158 | positive regulation of cell cycle arrest | 22 | 3.03E-09 |
| BP | GO:0043484 | regulation of RNA splicing | 26 | 4.18E-09 |
| BP | GO:0032508 | DNA duplex unwinding | 21 | 4.29E-09 |
| BP | GO:2000134 | negative regulation of G1/S transition of mitotic cell cycle | 27 | 4.63E-09 |
| BP | GO:0007062 | sister chromatid cohesion | 17 | 6.15E-09 |
| BP | GO:0016925 | protein sumoylation | 21 | 7.16E-09 |
| BP | GO:0010212 | response to ionizing radiation | 29 | 7.16E-09 |
| BP | GO:0016072 | rRNA metabolic process | 34 | 7.26E-09 |
| BP | GO:0007076 | mitotic chromosome condensation | 10 | 7.26E-09 |
| BP | GO:0040001 | establishment of mitotic spindle localization | 13 | 7.77E-09 |
| BP | GO:0042254 | ribosome biogenesis | 35 | 8.50E-09 |
| BP | GO:1900034 | regulation of cellular response to heat | 21 | 9.04E-09 |
| BP | GO:0000910 | cytokinesis | 29 | 1.16E-08 |
| BP | GO:1902807 | negative regulation of cell cycle G1/S phase transition | 27 | 1.36E-08 |
| BP | GO:0090305 | nucleic acid phosphodiester bond hydrolysis | 41 | 1.41E-08 |
| BP | GO:0070200 | establishment of protein localization to telomere | 10 | 1.78E-08 |
| BP | GO:0030330 | DNA damage response, signal transduction by p53 class mediator | 24 | 1.86E-08 |
| BP | GO:0051972 | regulation of telomerase activity | 16 | 2.69E-08 |
| BP | GO:0071156 | regulation of cell cycle arrest | 24 | 2.76E-08 |
| BP | GO:1903312 | negative regulation of mRNA metabolic process | 19 | 3.05E-08 |
| BP | GO:0071459 | protein localization to chromosome, centromeric region | 11 | 3.29E-08 |
| BP | GO:1903405 | protein localization to nuclear body | 8 | 4.29E-08 |
| BP | GO:1904851 | positive regulation of establishment of protein localization to telomere | 8 | 4.29E-08 |
| BP | GO:1904867 | protein localization to Cajal body | 8 | 4.29E-08 |
| BP | GO:2000045 | regulation of G1/S transition of mitotic cell cycle | 31 | 6.02E-08 |
| BP | GO:0050686 | negative regulation of mRNA processing | 12 | 6.44E-08 |
| BP | GO:0070316 | regulation of G0 to G1 transition | 15 | 8.43E-08 |
| BP | GO:1904814 | regulation of protein localization to chromosome, telomeric region | 9 | 8.49E-08 |
| BP | GO:0051298 | centrosome duplication | 17 | 9.86E-08 |
| BP | GO:0070198 | protein localization to chromosome, telomeric region | 12 | 1.05E-07 |
| BP | GO:0006297 | nucleotide-excision repair, DNA gap filling | 11 | 1.09E-07 |
| BP | GO:0070203 | regulation of establishment of protein localization to telomere | 8 | 1.45E-07 |
| BP | GO:0045023 | G0 to G1 transition | 15 | 1.61E-07 |
| BP | GO:0048025 | negative regulation of mRNA splicing, via spliceosome | 10 | 1.61E-07 |
| BP | GO:0090670 | RNA localization to Cajal body | 10 | 1.61E-07 |
| BP | GO:0090671 | telomerase RNA localization to Cajal body | 10 | 1.61E-07 |
| BP | GO:0090672 | telomerase RNA localization | 10 | 1.61E-07 |
| BP | GO:0090685 | RNA localization to nucleus | 10 | 1.61E-07 |
| BP | GO:1902806 | regulation of cell cycle G1/S phase transition | 32 | 1.65E-07 |
| BP | GO:0051653 | spindle localization | 14 | 1.82E-07 |
| BP | GO:0070317 | negative regulation of G0 to G1 transition | 14 | 1.82E-07 |
| BP | GO:0033119 | negative regulation of RNA splicing | 11 | 1.82E-07 |
| BP | GO:0070199 | establishment of protein localization to chromosome | 11 | 1.82E-07 |
| BP | GO:0051293 | establishment of spindle localization | 13 | 2.77E-07 |
| BP | GO:2001020 | regulation of response to DNA damage stimulus | 32 | 3.41E-07 |
| BP | GO:0051988 | regulation of attachment of spindle microtubules to kinetochore | 8 | 3.85E-07 |
| BP | GO:0070202 | regulation of establishment of protein localization to chromosome | 8 | 3.85E-07 |
| BP | GO:1904816 | positive regulation of protein localization to chromosome, telomeric region | 8 | 3.85E-07 |
| BP | GO:1990173 | protein localization to nucleoplasm | 8 | 3.85E-07 |
| BP | GO:1901976 | regulation of cell cycle checkpoint | 12 | 3.87E-07 |
| BP | GO:0034501 | protein localization to kinetochore | 9 | 3.99E-07 |
| BP | GO:0034605 | cellular response to heat | 23 | 6.17E-07 |
| BP | GO:0006298 | mismatch repair | 11 | 7.89E-07 |
| BP | GO:0000018 | regulation of DNA recombination | 19 | 8.83E-07 |
| BP | GO:0007050 | cell cycle arrest | 34 | 8.83E-07 |
| BP | GO:0043414 | macromolecule methylation | 38 | 9.10E-07 |
| BP | GO:0009408 | response to heat | 27 | 9.13E-07 |
| BP | GO:0010824 | regulation of centrosome duplication | 13 | 1.12E-06 |
| BP | GO:0006282 | regulation of DNA repair | 22 | 1.20E-06 |
| BP | GO:0006301 | postreplication repair | 14 | 1.21E-06 |
| BP | GO:0072698 | protein localization to microtubule cytoskeleton | 14 | 1.21E-06 |
| BP | GO:1904872 | regulation of telomerase RNA localization to Cajal body | 9 | 1.47E-06 |
| BP | GO:0090224 | regulation of spindle organization | 13 | 1.53E-06 |
| BP | GO:1901989 | positive regulation of cell cycle phase transition | 20 | 1.98E-06 |
| BP | GO:0006401 | RNA catabolic process | 45 | 1.98E-06 |
| BP | GO:0006364 | rRNA processing | 26 | 1.98E-06 |
| BP | GO:0000132 | establishment of mitotic spindle orientation | 10 | 2.37E-06 |
| BP | GO:0008334 | histone mRNA metabolic process | 10 | 2.37E-06 |
| BP | GO:0010971 | positive regulation of G2/M transition of mitotic cell cycle | 10 | 2.37E-06 |
| BP | GO:0060271 | cilium assembly | 42 | 2.56E-06 |
| BP | GO:0006283 | transcription-coupled nucleotide-excision repair | 17 | 2.63E-06 |
| BP | GO:0007143 | female meiotic nuclear division | 11 | 2.65E-06 |
| BP | GO:0044380 | protein localization to cytoskeleton | 14 | 2.73E-06 |
| BP | GO:1901992 | positive regulation of mitotic cell cycle phase transition | 18 | 2.97E-06 |
| BP | GO:0060236 | regulation of mitotic spindle organization | 12 | 3.44E-06 |
| BP | GO:0006479 | protein methylation | 27 | 3.51E-06 |
| BP | GO:0008213 | protein alkylation | 27 | 3.51E-06 |
| BP | GO:0000079 | regulation of cyclin-dependent protein serine/threonine kinase activity | 18 | 3.55E-06 |
| BP | GO:0006369 | termination of RNA polymerase II transcription | 11 | 3.82E-06 |
| BP | GO:1904874 | positive regulation of telomerase RNA localization to Cajal body | 8 | 3.85E-06 |
| BP | GO:0045132 | meiotic chromosome segregation | 16 | 4.01E-06 |
| BP | GO:0016571 | histone methylation | 23 | 4.13E-06 |
| BP | GO:0000076 | DNA replication checkpoint | 7 | 4.31E-06 |
| BP | GO:0016572 | histone phosphorylation | 12 | 4.61E-06 |
| BP | GO:0042769 | DNA damage response, detection of DNA damage | 12 | 4.61E-06 |
| BP | GO:0051493 | regulation of cytoskeleton organization | 52 | 5.68E-06 |
| BP | GO:0044782 | cilium organization | 42 | 5.83E-06 |
| BP | GO:0006353 | DNA-templated transcription, termination | 16 | 6.03E-06 |
| BP | GO:0051382 | kinetochore assembly | 8 | 7.11E-06 |
| BP | GO:1904029 | regulation of cyclin-dependent protein kinase activity | 18 | 7.17E-06 |
| BP | GO:0045005 | DNA-dependent DNA replication maintenance of fidelity | 11 | 7.58E-06 |
| BP | GO:1902751 | positive regulation of cell cycle G2/M phase transition | 10 | 8.10E-06 |
| BP | GO:0034404 | nucleobase-containing small molecule biosynthetic process | 30 | 9.76E-06 |
| BP | GO:0000726 | non-recombinational repair | 18 | 1.01E-05 |
| BP | GO:0000381 | regulation of alternative mRNA splicing, via spliceosome | 12 | 1.12E-05 |
| BP | GO:0051294 | establishment of spindle orientation | 10 | 1.18E-05 |
| BP | GO:0034968 | histone lysine methylation | 20 | 1.27E-05 |
| BP | GO:1903578 | regulation of ATP metabolic process | 20 | 1.47E-05 |
| BP | GO:1900182 | positive regulation of protein localization to nucleus | 16 | 1.59E-05 |
| BP | GO:0032465 | regulation of cytokinesis | 17 | 1.66E-05 |
| BP | GO:0031297 | replication fork processing | 10 | 1.69E-05 |
| BP | GO:0032259 | methylation | 40 | 1.71E-05 |
| BP | GO:0000731 | DNA synthesis involved in DNA repair | 13 | 1.71E-05 |
| BP | GO:0006289 | nucleotide-excision repair | 19 | 1.82E-05 |
| BP | GO:0006110 | regulation of glycolytic process | 16 | 1.89E-05 |
| BP | GO:0043470 | regulation of carbohydrate catabolic process | 17 | 1.94E-05 |
| BP | GO:0018022 | peptidyl-lysine methylation | 21 | 1.96E-05 |
| BP | GO:0031109 | microtubule polymerization or depolymerization | 18 | 2.23E-05 |
| BP | GO:0043161 | proteasome-mediated ubiquitin-dependent protein catabolic process | 39 | 2.34E-05 |
| BP | GO:0030811 | regulation of nucleotide catabolic process | 16 | 2.69E-05 |
| BP | GO:1903829 | positive regulation of cellular protein localization | 38 | 2.78E-05 |
| BP | GO:0071479 | cellular response to ionizing radiation | 15 | 3.04E-05 |
| BP | GO:0006998 | nuclear envelope organization | 12 | 3.16E-05 |
| BP | GO:0009314 | response to radiation | 47 | 3.20E-05 |
| BP | GO:0006354 | DNA-templated transcription, elongation | 19 | 3.20E-05 |
| BP | GO:0006284 | base-excision repair | 11 | 3.40E-05 |
| BP | GO:0090231 | regulation of spindle checkpoint | 7 | 3.45E-05 |
| BP | GO:0090266 | regulation of mitotic cell cycle spindle assembly checkpoint | 7 | 3.45E-05 |
| BP | GO:1903504 | regulation of mitotic spindle checkpoint | 7 | 3.45E-05 |
| BP | GO:0006997 | nucleus organization | 20 | 4.26E-05 |
| BP | GO:0000245 | spliceosomal complex assembly | 15 | 4.32E-05 |
| BP | GO:0034770 | histone H4-K20 methylation | 6 | 4.59E-05 |
| BP | GO:0051315 | attachment of mitotic spindle microtubules to kinetochore | 6 | 4.59E-05 |
| BP | GO:0006402 | mRNA catabolic process | 39 | 4.65E-05 |
| BP | GO:0006303 | double-strand break repair via nonhomologous end joining | 16 | 5.16E-05 |
| BP | GO:0051053 | negative regulation of DNA metabolic process | 22 | 5.66E-05 |
| BP | GO:0019985 | translesion synthesis | 11 | 5.72E-05 |
| BP | GO:0045840 | positive regulation of mitotic nuclear division | 12 | 6.31E-05 |
| BP | GO:0022618 | ribonucleoprotein complex assembly | 28 | 6.56E-05 |
| BP | GO:0051656 | establishment of organelle localization | 47 | 6.78E-05 |
| BP | GO:1902275 | regulation of chromatin organization | 24 | 7.33E-05 |
| BP | GO:0007063 | regulation of sister chromatid cohesion | 8 | 7.70E-05 |
| BP | GO:0098534 | centriole assembly | 10 | 0.00010475 |
| BP | GO:1904666 | regulation of ubiquitin protein ligase activity | 8 | 0.000114777 |
| BP | GO:0051785 | positive regulation of nuclear division | 13 | 0.000137696 |
| BP | GO:1900542 | regulation of purine nucleotide metabolic process | 20 | 0.00014391 |
| BP | GO:0060968 | regulation of gene silencing | 21 | 0.000149346 |
| BP | GO:0009266 | response to temperature stimulus | 28 | 0.000156181 |
| BP | GO:1904355 | positive regulation of telomere capping | 7 | 0.000159784 |
| BP | GO:0006165 | nucleoside diphosphate phosphorylation | 20 | 0.000160081 |
| BP | GO:0000729 | DNA double-strand break processing | 8 | 0.000164365 |
| BP | GO:0051302 | regulation of cell division | 23 | 0.000164909 |
| BP | GO:0016573 | histone acetylation | 22 | 0.000165881 |
| BP | GO:0006296 | nucleotide-excision repair, DNA incision, 5'-to lesion | 10 | 0.000173614 |
| BP | GO:0032467 | positive regulation of cytokinesis | 10 | 0.000173614 |
| BP | GO:0032506 | cytokinetic process | 10 | 0.000173614 |
| BP | GO:0071826 | ribonucleoprotein complex subunit organization | 28 | 0.00018038 |
| BP | GO:0071539 | protein localization to centrosome | 9 | 0.000182927 |
| BP | GO:0045739 | positive regulation of DNA repair | 13 | 0.000192569 |
| BP | GO:0006096 | glycolytic process | 18 | 0.000194491 |
| BP | GO:0051196 | regulation of coenzyme metabolic process | 16 | 0.000194491 |
| BP | GO:2001169 | regulation of ATP biosynthetic process | 16 | 0.000194491 |
| BP | GO:0046939 | nucleotide phosphorylation | 20 | 0.000194491 |
| BP | GO:0018394 | peptidyl-lysine acetylation | 23 | 0.000195046 |
| BP | GO:0006140 | regulation of nucleotide metabolic process | 20 | 0.000216813 |
| BP | GO:0006757 | ATP generation from ADP | 18 | 0.000217978 |
| BP | GO:0061982 | meiosis I cell cycle process | 16 | 0.000221587 |
| BP | GO:0045814 | negative regulation of gene expression, epigenetic | 17 | 0.000222301 |
| BP | GO:2000779 | regulation of double-strand break repair | 14 | 0.000222301 |
| BP | GO:0042276 | error-prone translesion synthesis | 7 | 0.000234764 |
| BP | GO:0007099 | centriole replication | 9 | 0.000236092 |
| BP | GO:1905508 | protein localization to microtubule organizing center | 9 | 0.000236092 |
| BP | GO:0043467 | regulation of generation of precursor metabolites and energy | 21 | 0.000240077 |
| BP | GO:0018393 | internal peptidyl-lysine acetylation | 22 | 0.000262787 |
| BP | GO:0033683 | nucleotide-excision repair, DNA incision | 10 | 0.000272582 |
| BP | GO:0019080 | viral gene expression | 25 | 0.000276032 |
| BP | GO:0062033 | positive regulation of mitotic sister chromatid segregation | 6 | 0.000287181 |
| BP | GO:0042866 | pyruvate biosynthetic process | 18 | 0.000305572 |
| BP | GO:0010498 | proteasomal protein catabolic process | 40 | 0.000310682 |
| BP | GO:0098781 | ncRNA transcription | 17 | 0.000318496 |
| BP | GO:0070987 | error-free translesion synthesis | 7 | 0.000344118 |
| BP | GO:1904353 | regulation of telomere capping | 8 | 0.000416105 |
| BP | GO:0009124 | nucleoside monophosphate biosynthetic process | 25 | 0.000419194 |
| BP | GO:0006475 | internal protein amino acid acetylation | 22 | 0.000419194 |
| BP | GO:0010569 | regulation of double-strand break repair via homologous recombination | 10 | 0.000424814 |
| BP | GO:1900180 | regulation of protein localization to nucleus | 18 | 0.000427199 |
| BP | GO:0032211 | negative regulation of telomere maintenance via telomerase | 7 | 0.000495855 |
| BP | GO:0070734 | histone H3-K27 methylation | 7 | 0.000495855 |
| BP | GO:0043487 | regulation of RNA stability | 22 | 0.000500582 |
| BP | GO:0007019 | microtubule depolymerization | 9 | 0.000506829 |
| BP | GO:0009142 | nucleoside triphosphate biosynthetic process | 23 | 0.000516496 |
| BP | GO:0034504 | protein localization to nucleus | 27 | 0.000516921 |
| BP | GO:0007127 | meiosis I | 15 | 0.000541758 |
| BP | GO:0045740 | positive regulation of DNA replication | 9 | 0.000643682 |
| BP | GO:0046031 | ADP metabolic process | 18 | 0.000657087 |
| BP | GO:0046822 | regulation of nucleocytoplasmic transport | 16 | 0.000678028 |
| BP | GO:0032205 | negative regulation of telomere maintenance | 9 | 0.000811941 |
| BP | GO:0006360 | transcription by RNA polymerase I | 12 | 0.000830868 |
| BP | GO:0009263 | deoxyribonucleotide biosynthetic process | 5 | 0.000830868 |
| BP | GO:0051231 | spindle elongation | 5 | 0.000830868 |
| BP | GO:0075522 | IRES-dependent viral translational initiation | 5 | 0.000830868 |
| BP | GO:0016233 | telomere capping | 11 | 0.000836084 |
| BP | GO:0009166 | nucleotide catabolic process | 22 | 0.000836699 |
| BP | GO:0043488 | regulation of mRNA stability | 21 | 0.000888433 |
| BP | GO:2001022 | positive regulation of response to DNA damage stimulus | 15 | 0.000890464 |
| BP | GO:0006473 | protein acetylation | 24 | 0.000990593 |
| BP | GO:0009411 | response to UV | 19 | 0.001063118 |
| BP | GO:0030397 | membrane disassembly | 6 | 0.001073575 |
| BP | GO:0051081 | nuclear envelope disassembly | 6 | 0.001073575 |
| BP | GO:0031056 | regulation of histone modification | 19 | 0.001162603 |
| BP | GO:0071478 | cellular response to radiation | 22 | 0.001162603 |
| BP | GO:0009303 | rRNA transcription | 8 | 0.0011936 |
| BP | GO:0007064 | mitotic sister chromatid cohesion | 7 | 0.001278405 |
| BP | GO:0060147 | regulation of posttranscriptional gene silencing | 17 | 0.001329465 |
| BP | GO:0060966 | regulation of gene silencing by RNA | 17 | 0.001329465 |
| BP | GO:0046434 | organophosphate catabolic process | 26 | 0.001340865 |
| BP | GO:0051438 | regulation of ubiquitin-protein transferase activity | 10 | 0.001353619 |
| BP | GO:1901292 | nucleoside phosphate catabolic process | 22 | 0.001353619 |
| BP | GO:0007100 | mitotic centrosome separation | 5 | 0.001388531 |
| BP | GO:2000105 | positive regulation of DNA-dependent DNA replication | 5 | 0.001388531 |
| BP | GO:0009156 | ribonucleoside monophosphate biosynthetic process | 23 | 0.001446641 |
| BP | GO:0032784 | regulation of DNA-templated transcription, elongation | 9 | 0.001487343 |
| BP | GO:0006266 | DNA ligation | 6 | 0.001530781 |
| BP | GO:0009132 | nucleoside diphosphate metabolic process | 20 | 0.001551925 |
| BP | GO:1902750 | negative regulation of cell cycle G2/M phase transition | 15 | 0.001564709 |
| BP | GO:0061013 | regulation of mRNA catabolic process | 22 | 0.001701592 |
| BP | GO:1900371 | regulation of purine nucleotide biosynthetic process | 16 | 0.00178316 |
| BP | GO:0030808 | regulation of nucleotide biosynthetic process | 16 | 0.001981621 |
| BP | GO:0009135 | purine nucleoside diphosphate metabolic process | 18 | 0.002064883 |
| BP | GO:0009179 | purine ribonucleoside diphosphate metabolic process | 18 | 0.002064883 |
| BP | GO:0000212 | meiotic spindle organization | 5 | 0.002190279 |
| BP | GO:0006999 | nuclear pore organization | 5 | 0.002190279 |
| BP | GO:0007077 | mitotic nuclear envelope disassembly | 5 | 0.002190279 |
| BP | GO:0032785 | negative regulation of DNA-templated transcription, elongation | 5 | 0.002190279 |
| BP | GO:0051299 | centrosome separation | 5 | 0.002190279 |
| BP | GO:1904668 | positive regulation of ubiquitin protein ligase activity | 5 | 0.002190279 |
| BP | GO:0000387 | spliceosomal snRNP assembly | 10 | 0.00221669 |
| BP | GO:1905269 | positive regulation of chromatin organization | 15 | 0.002396183 |
| BP | GO:0009185 | ribonucleoside diphosphate metabolic process | 18 | 0.00243995 |
| BP | GO:0060964 | regulation of gene silencing by miRNA | 16 | 0.002638158 |
| BP | GO:0031440 | regulation of mRNA 3'-end processing | 7 | 0.002788712 |
| BP | GO:0051193 | regulation of cofactor metabolic process | 16 | 0.002907898 |
| BP | GO:0031061 | negative regulation of histone methylation | 6 | 0.002913941 |
| BP | GO:0046599 | regulation of centriole replication | 6 | 0.002913941 |
| BP | GO:0070192 | chromosome organization involved in meiotic cell cycle | 10 | 0.003044902 |
| BP | GO:0009127 | purine nucleoside monophosphate biosynthetic process | 21 | 0.003122835 |
| BP | GO:0009168 | purine ribonucleoside monophosphate biosynthetic process | 21 | 0.003122835 |
| BP | GO:0042790 | nucleolar large rRNA transcription by RNA polymerase I | 5 | 0.003302703 |
| BP | GO:1901836 | regulation of transcription of nucleolar large rRNA by RNA polymerase I | 5 | 0.003302703 |
| BP | GO:0051569 | regulation of histone H3-K4 methylation | 7 | 0.003504043 |
| BP | GO:0090169 | regulation of spindle assembly | 7 | 0.003504043 |
| BP | GO:1904357 | negative regulation of telomere maintenance via telomere lengthening | 7 | 0.003504043 |
| BP | GO:0009201 | ribonucleoside triphosphate biosynthetic process | 20 | 0.003677366 |
| BP | GO:0043967 | histone H4 acetylation | 11 | 0.003677366 |
| BP | GO:0009123 | nucleoside monophosphate metabolic process | 34 | 0.003876869 |
| BP | GO:0008156 | negative regulation of DNA replication | 8 | 0.004191929 |
| BP | GO:0031060 | regulation of histone methylation | 11 | 0.004203511 |
| BP | GO:0009141 | nucleoside triphosphate metabolic process | 33 | 0.004241923 |
| BP | GO:0019359 | nicotinamide nucleotide biosynthetic process | 18 | 0.004343147 |
| BP | GO:0019363 | pyridine nucleotide biosynthetic process | 18 | 0.004343147 |
| BP | GO:0071168 | protein localization to chromatin | 7 | 0.004371009 |
| BP | GO:0019058 | viral life cycle | 32 | 0.004386067 |
| BP | GO:0019362 | pyridine nucleotide metabolic process | 21 | 0.004406156 |
| BP | GO:0046496 | nicotinamide nucleotide metabolic process | 21 | 0.004406156 |
| BP | GO:0006733 | oxidoreduction coenzyme metabolic process | 22 | 0.004533076 |
| BP | GO:0019081 | viral translation | 5 | 0.00472947 |
| BP | GO:0090501 | RNA phosphodiester bond hydrolysis | 17 | 0.005044254 |
| BP | GO:0006890 | retrograde vesicle-mediated transport, Golgi to ER | 12 | 0.005139302 |
| BP | GO:0043543 | protein acylation | 25 | 0.005232297 |
| BP | GO:0009262 | deoxyribonucleotide metabolic process | 7 | 0.005392945 |
| BP | GO:0072525 | pyridine-containing compound biosynthetic process | 18 | 0.005455617 |
| BP | GO:0031058 | positive regulation of histone modification | 13 | 0.005897056 |
| BP | GO:0050821 | protein stabilization | 20 | 0.0060458 |
| BP | GO:0072524 | pyridine-containing compound metabolic process | 21 | 0.006206778 |
| BP | GO:0009206 | purine ribonucleoside triphosphate biosynthetic process | 19 | 0.006226666 |
| BP | GO:0006090 | pyruvate metabolic process | 18 | 0.006355023 |
| BP | GO:0031572 | G2 DNA damage checkpoint | 7 | 0.006568592 |
| BP | GO:0001325 | formation of extrachromosomal circular DNA | 5 | 0.006568592 |
| BP | GO:0046931 | pore complex assembly | 5 | 0.006568592 |
| BP | GO:0090656 | t-circle formation | 5 | 0.006568592 |
| BP | GO:0090737 | telomere maintenance via telomere trimming | 5 | 0.006568592 |
| BP | GO:0007018 | microtubule-based movement | 24 | 0.006605035 |
| BP | GO:0009145 | purine nucleoside triphosphate biosynthetic process | 19 | 0.006605035 |
| BP | GO:0006109 | regulation of carbohydrate metabolic process | 22 | 0.006605035 |
| BP | GO:1902369 | negative regulation of RNA catabolic process | 9 | 0.007777262 |
| BP | GO:0006754 | ATP biosynthetic process | 18 | 0.007893879 |
| BP | GO:0033262 | regulation of nuclear cell cycle DNA replication | 5 | 0.008952143 |
| BP | GO:2000001 | regulation of DNA damage checkpoint | 5 | 0.008952143 |
| BP | GO:0002562 | somatic diversification of immune receptors via germline recombination within a single locus | 10 | 0.008952143 |
| BP | GO:0016444 | somatic cell DNA recombination | 10 | 0.008952143 |
| BP | GO:0046824 | positive regulation of nucleocytoplasmic transport | 10 | 0.008952143 |
| BP | GO:0019083 | viral transcription | 20 | 0.008952779 |
| BP | GO:0032388 | positive regulation of intracellular transport | 22 | 0.009024314 |
| BP | GO:0009163 | nucleoside biosynthetic process | 8 | 0.00960641 |
| BP | GO:0031057 | negative regulation of histone modification | 8 | 0.00960641 |
| BP | GO:0043489 | RNA stabilization | 8 | 0.00960641 |
| BP | GO:0008033 | tRNA processing | 14 | 0.009983327 |
| BP | GO:0034244 | negative regulation of transcription elongation from RNA polymerase II promoter | 4 | 0.01007514 |
| BP | GO:0046607 | positive regulation of centrosome cycle | 4 | 0.01007514 |
| BP | GO:0051255 | spindle midzone assembly | 4 | 0.01007514 |
| BP | GO:0061085 | regulation of histone H3-K27 methylation | 4 | 0.01007514 |
| BP | GO:0072697 | protein localization to cell cortex | 4 | 0.01007514 |
| BP | GO:1901838 | positive regulation of transcription of nucleolar large rRNA by RNA polymerase I | 4 | 0.01007514 |
| BP | GO:1902410 | mitotic cytokinetic process | 6 | 0.010109264 |
| BP | GO:1901659 | glycosyl compound biosynthetic process | 8 | 0.011118023 |
| BP | GO:0009161 | ribonucleoside monophosphate metabolic process | 31 | 0.011549756 |
| BP | GO:0051568 | histone H3-K4 methylation | 9 | 0.011549756 |
| BP | GO:0006379 | mRNA cleavage | 5 | 0.011665228 |
| BP | GO:0009148 | pyrimidine nucleoside triphosphate biosynthetic process | 5 | 0.011665228 |
| BP | GO:0034629 | cellular protein-containing complex localization | 5 | 0.011665228 |
| BP | GO:0022411 | cellular component disassembly | 42 | 0.011791656 |
| BP | GO:0031396 | regulation of protein ubiquitination | 21 | 0.012828028 |
| BP | GO:1902373 | negative regulation of mRNA catabolic process | 8 | 0.012828028 |
| BP | GO:1903320 | regulation of protein modification by small protein conjugation or removal | 23 | 0.01310498 |
| BP | GO:0000956 | nuclear-transcribed mRNA catabolic process | 21 | 0.013601593 |
| BP | GO:0034248 | regulation of cellular amide metabolic process | 39 | 0.013986252 |
| BP | GO:0016052 | carbohydrate catabolic process | 20 | 0.014575962 |
| BP | GO:0019042 | viral latency | 4 | 0.014633284 |
| BP | GO:0035404 | histone-serine phosphorylation | 4 | 0.014633284 |
| BP | GO:0046831 | regulation of RNA export from nucleus | 4 | 0.014633284 |
| BP | GO:0051573 | negative regulation of histone H3-K9 methylation | 4 | 0.014633284 |
| BP | GO:0006312 | mitotic recombination | 5 | 0.015030628 |
| BP | GO:0006346 | methylation-dependent chromatin silencing | 5 | 0.015030628 |
| BP | GO:0051782 | negative regulation of cell division | 5 | 0.015030628 |
| BP | GO:0006399 | tRNA metabolic process | 18 | 0.015253856 |
| BP | GO:0010332 | response to gamma radiation | 9 | 0.01668895 |
| BP | GO:0046390 | ribose phosphate biosynthetic process | 27 | 0.017614904 |
| BP | GO:0048255 | mRNA stabilization | 7 | 0.018539634 |
| BP | GO:0051170 | import into nucleus | 15 | 0.018592785 |
| BP | GO:0009147 | pyrimidine nucleoside triphosphate metabolic process | 5 | 0.019294022 |
| BP | GO:0031647 | regulation of protein stability | 26 | 0.019358391 |
| BP | GO:0002200 | somatic diversification of immune receptors | 10 | 0.019446598 |
| BP | GO:0070646 | protein modification by small protein removal | 26 | 0.020277107 |
| BP | GO:0000722 | telomere maintenance via recombination | 4 | 0.02043222 |
| BP | GO:0010457 | centriole-centriole cohesion | 4 | 0.02043222 |
| BP | GO:0051095 | regulation of helicase activity | 4 | 0.02043222 |
| BP | GO:0006368 | transcription elongation from RNA polymerase II promoter | 11 | 0.021094316 |
| BP | GO:0009167 | purine ribonucleoside monophosphate metabolic process | 29 | 0.021452432 |
| BP | GO:0034250 | positive regulation of cellular amide metabolic process | 16 | 0.021881117 |
| BP | GO:0010458 | exit from mitosis | 6 | 0.021881117 |
| BP | GO:0050685 | positive regulation of mRNA processing | 6 | 0.021881117 |
| BP | GO:0051443 | positive regulation of ubiquitin-protein transferase activity | 6 | 0.021881117 |
| BP | GO:0070979 | protein K11-linked ubiquitination | 6 | 0.021881117 |
| BP | GO:0009126 | purine nucleoside monophosphate metabolic process | 29 | 0.022198737 |
| BP | GO:1903322 | positive regulation of protein modification by small protein conjugation or removal | 15 | 0.022719823 |
| BP | GO:0009199 | ribonucleoside triphosphate metabolic process | 29 | 0.023140242 |
| BP | GO:0043984 | histone H4-K16 acetylation | 5 | 0.023788156 |
| BP | GO:1901673 | regulation of mitotic spindle assembly | 5 | 0.023788156 |
| BP | GO:2000279 | negative regulation of DNA biosynthetic process | 7 | 0.024569212 |
| BP | GO:1905268 | negative regulation of chromatin organization | 8 | 0.024629923 |
| BP | GO:0009144 | purine nucleoside triphosphate metabolic process | 29 | 0.025075868 |
| BP | GO:0043624 | cellular protein complex disassembly | 20 | 0.025225239 |
| BP | GO:1901293 | nucleoside phosphate biosynthetic process | 32 | 0.025266313 |
| BP | GO:0051261 | protein depolymerization | 12 | 0.025597388 |
| BP | GO:0071480 | cellular response to gamma radiation | 6 | 0.025790008 |
| BP | GO:0090502 | RNA phosphodiester bond hydrolysis, endonucleolytic | 10 | 0.025792571 |
| BP | GO:0009260 | ribonucleotide biosynthetic process | 26 | 0.025991692 |
| BP | GO:0001833 | inner cell mass cell proliferation | 4 | 0.026993175 |
| BP | GO:0032239 | regulation of nucleobase-containing compound transport | 4 | 0.026993175 |
| BP | GO:0033127 | regulation of histone phosphorylation | 4 | 0.026993175 |
| BP | GO:0035563 | positive regulation of chromatin binding | 4 | 0.026993175 |
| BP | GO:0006417 | regulation of translation | 34 | 0.027397751 |
| BP | GO:0016447 | somatic recombination of immunoglobulin gene segments | 8 | 0.027435068 |
| BP | GO:0031062 | positive regulation of histone methylation | 7 | 0.027823004 |
| BP | GO:0051098 | regulation of binding | 32 | 0.027959046 |
| BP | GO:0000288 | nuclear-transcribed mRNA catabolic process, deadenylation-dependent decay | 10 | 0.028114883 |
| BP | GO:2000104 | negative regulation of DNA-dependent DNA replication | 5 | 0.028853362 |
| BP | GO:1902115 | regulation of organelle assembly | 19 | 0.03004266 |
| BP | GO:2000781 | positive regulation of double-strand break repair | 6 | 0.03004266 |
| BP | GO:0009451 | RNA modification | 14 | 0.030566136 |
| BP | GO:0032984 | protein-containing complex disassembly | 27 | 0.03147046 |
| BP | GO:0006400 | tRNA modification | 9 | 0.031515306 |
| BP | GO:0051781 | positive regulation of cell division | 11 | 0.031964143 |
| BP | GO:0009205 | purine ribonucleoside triphosphate metabolic process | 28 | 0.033447736 |
| BP | GO:0019886 | antigen processing and presentation of exogenous peptide antigen via MHC class II | 12 | 0.034812254 |
| BP | GO:0010972 | negative regulation of G2/M transition of mitotic cell cycle | 11 | 0.03482273 |
| BP | GO:0032786 | positive regulation of DNA-templated transcription, elongation | 5 | 0.03482273 |
| BP | GO:0045943 | positive regulation of transcription by RNA polymerase I | 5 | 0.03482273 |
| BP | GO:0033120 | positive regulation of RNA splicing | 6 | 0.03482273 |
| BP | GO:0046606 | negative regulation of centrosome cycle | 4 | 0.03482273 |
| BP | GO:0051307 | meiotic chromosome separation | 4 | 0.03482273 |
| BP | GO:0072425 | signal transduction involved in G2 DNA damage checkpoint | 4 | 0.03482273 |
| BP | GO:1902570 | protein localization to nucleolus | 4 | 0.03482273 |
| BP | GO:0009165 | nucleotide biosynthetic process | 31 | 0.035547974 |
| BP | GO:0046034 | ATP metabolic process | 26 | 0.035833361 |
| BP | GO:0031398 | positive regulation of protein ubiquitination | 13 | 0.036016665 |
| BP | GO:0000209 | protein polyubiquitination | 26 | 0.037347712 |
| BP | GO:0006457 | protein folding | 18 | 0.037803781 |
| BP | GO:0016579 | protein deubiquitination | 24 | 0.038538853 |
| BP | GO:0001824 | blastocyst development | 12 | 0.039954804 |
| BP | GO:0031100 | animal organ regeneration | 10 | 0.039977112 |
| BP | GO:0000289 | nuclear-transcribed mRNA poly(A) tail shortening | 6 | 0.04003875 |
| BP | GO:0006335 | DNA replication-dependent nucleosome assembly | 6 | 0.04003875 |
| BP | GO:0006356 | regulation of transcription by RNA polymerase I | 6 | 0.04003875 |
| BP | GO:0034723 | DNA replication-dependent nucleosome organization | 6 | 0.04003875 |
| BP | GO:0062012 | regulation of small molecule metabolic process | 36 | 0.040117748 |
| BP | GO:0006376 | mRNA splice site selection | 7 | 0.040143328 |
| BP | GO:0035561 | regulation of chromatin binding | 5 | 0.041318811 |
| BP | GO:0044818 | mitotic G2/M transition checkpoint | 5 | 0.041318811 |
| BP | GO:0002495 | antigen processing and presentation of peptide antigen via MHC class II | 12 | 0.042544946 |
| BP | GO:0009200 | deoxyribonucleoside triphosphate metabolic process | 4 | 0.044050534 |
| BP | GO:0031468 | nuclear envelope reassembly | 4 | 0.044050534 |
| BP | GO:0030010 | establishment of cell polarity | 14 | 0.044454623 |
| BP | GO:0002504 | antigen processing and presentation of peptide or polysaccharide antigen via MHC class II | 12 | 0.045718101 |
| BP | GO:0006370 | 7-methylguanosine mRNA capping | 6 | 0.045924204 |
| BP | GO:0042455 | ribonucleoside biosynthetic process | 6 | 0.045924204 |
| BP | GO:0030705 | cytoskeleton-dependent intracellular transport | 16 | 0.049112811 |
| BP | GO:0009152 | purine ribonucleotide biosynthetic process | 24 | 0.049122766 |
| BP | GO:0051642 | centrosome localization | 5 | 0.049122766 |
| BP | GO:0032386 | regulation of intracellular transport | 33 | 0.049592097 |
| CC | GO:0098687 | chromosomal region | 121 | 4.08E-66 |
| CC | GO:0000793 | condensed chromosome | 75 | 4.97E-42 |
| CC | GO:0000775 | chromosome, centromeric region | 72 | 1.37E-41 |
| CC | GO:0000779 | condensed chromosome, centromeric region | 54 | 1.29E-37 |
| CC | GO:0044454 | nuclear chromosome part | 107 | 1.29E-37 |
| CC | GO:0005819 | spindle | 89 | 1.29E-37 |
| CC | GO:0000776 | kinetochore | 57 | 3.20E-36 |
| CC | GO:0000777 | condensed chromosome kinetochore | 50 | 1.89E-35 |
| CC | GO:0005813 | centrosome | 93 | 2.59E-27 |
| CC | GO:0000781 | chromosome, telomeric region | 52 | 2.23E-26 |
| CC | GO:0005681 | spliceosomal complex | 51 | 7.33E-25 |
| CC | GO:0000785 | chromatin | 91 | 3.03E-24 |
| CC | GO:0000922 | spindle pole | 47 | 2.63E-22 |
| CC | GO:0000784 | nuclear chromosome, telomeric region | 40 | 3.54E-20 |
| CC | GO:0071013 | catalytic step 2 spliceosome | 32 | 1.23E-18 |
| CC | GO:0005874 | microtubule | 66 | 6.92E-18 |
| CC | GO:0016607 | nuclear speck | 66 | 4.37E-16 |
| CC | GO:0000790 | nuclear chromatin | 58 | 4.79E-16 |
| CC | GO:0072686 | mitotic spindle | 31 | 3.04E-15 |
| CC | GO:0005657 | replication fork | 23 | 1.80E-14 |
| CC | GO:0030496 | midbody | 39 | 1.11E-13 |
| CC | GO:0005876 | spindle microtubule | 21 | 1.72E-12 |
| CC | GO:0005684 | U2-type spliceosomal complex | 24 | 9.66E-12 |
| CC | GO:0005635 | nuclear envelope | 61 | 1.10E-11 |
| CC | GO:0071005 | U2-type precatalytic spliceosome | 19 | 2.31E-11 |
| CC | GO:0071011 | precatalytic spliceosome | 19 | 2.31E-11 |
| CC | GO:0044450 | microtubule organizing center part | 35 | 5.31E-11 |
| CC | GO:0018995 | host | 22 | 5.83E-11 |
| CC | GO:0043657 | host cell | 22 | 5.83E-11 |
| CC | GO:0000940 | condensed chromosome outer kinetochore | 10 | 1.61E-10 |
| CC | GO:0034708 | methyltransferase complex | 24 | 2.44E-10 |
| CC | GO:0044215 | other organism | 22 | 3.22E-10 |
| CC | GO:0044216 | other organism cell | 22 | 3.22E-10 |
| CC | GO:0044217 | other organism part | 22 | 3.22E-10 |
| CC | GO:0005814 | centriole | 28 | 6.25E-10 |
| CC | GO:0000792 | heterochromatin | 21 | 2.29E-09 |
| CC | GO:0000794 | condensed nuclear chromosome | 20 | 1.58E-08 |
| CC | GO:0090734 | site of DNA damage | 18 | 5.36E-08 |
| CC | GO:0005720 | nuclear heterochromatin | 13 | 6.27E-08 |
| CC | GO:0034399 | nuclear periphery | 25 | 1.03E-07 |
| CC | GO:0042555 | MCM complex | 8 | 1.03E-07 |
| CC | GO:0031965 | nuclear membrane | 39 | 3.72E-07 |
| CC | GO:0005643 | nuclear pore | 16 | 4.69E-07 |
| CC | GO:0045171 | intercellular bridge | 16 | 4.69E-07 |
| CC | GO:0030532 | small nuclear ribonucleoprotein complex | 19 | 9.39E-07 |
| CC | GO:0097525 | spliceosomal snRNP complex | 18 | 9.87E-07 |
| CC | GO:0120114 | Sm-like protein family complex | 20 | 1.16E-06 |
| CC | GO:0035097 | histone methyltransferase complex | 16 | 1.89E-06 |
| CC | GO:0005721 | pericentric heterochromatin | 9 | 3.07E-06 |
| CC | GO:0030894 | replisome | 9 | 3.07E-06 |
| CC | GO:0035098 | ESC/E(Z) complex | 8 | 5.11E-06 |
| CC | GO:0016363 | nuclear matrix | 20 | 5.74E-06 |
| CC | GO:0000780 | condensed nuclear chromosome, centromeric region | 8 | 8.86E-06 |
| CC | GO:0035861 | site of double-strand break | 13 | 1.55E-05 |
| CC | GO:0071007 | U2-type catalytic step 2 spliceosome | 10 | 1.68E-05 |
| CC | GO:0046540 | U4/U6 x U5 tri-snRNP complex | 11 | 1.78E-05 |
| CC | GO:0097526 | spliceosomal tri-snRNP complex | 11 | 1.78E-05 |
| CC | GO:0005697 | telomerase holoenzyme complex | 8 | 2.25E-05 |
| CC | GO:0101031 | chaperone complex | 8 | 2.25E-05 |
| CC | GO:0016581 | NuRD complex | 7 | 2.30E-05 |
| CC | GO:0090545 | CHD-type complex | 7 | 2.30E-05 |
| CC | GO:0045120 | pronucleus | 7 | 4.04E-05 |
| CC | GO:0051233 | spindle midzone | 9 | 4.86E-05 |
| CC | GO:0015030 | Cajal body | 15 | 5.61E-05 |
| CC | GO:0031519 | PcG protein complex | 11 | 6.14E-05 |
| CC | GO:0070603 | SWI/SNF superfamily-type complex | 14 | 7.70E-05 |
| CC | GO:0034709 | methylosome | 6 | 0.000113244 |
| CC | GO:0000152 | nuclear ubiquitin ligase complex | 10 | 0.000145311 |
| CC | GO:0000151 | ubiquitin ligase complex | 28 | 0.000147128 |
| CC | GO:0043601 | nuclear replisome | 7 | 0.000154017 |
| CC | GO:1904949 | ATPase complex | 16 | 0.000162769 |
| CC | GO:0000346 | transcription export complex | 6 | 0.000184408 |
| CC | GO:0043240 | Fanconi anaemia nuclear complex | 6 | 0.000184408 |
| CC | GO:0035145 | exon-exon junction complex | 7 | 0.000220204 |
| CC | GO:0097431 | mitotic spindle pole | 8 | 0.000263228 |
| CC | GO:0044798 | nuclear transcription factor complex | 20 | 0.000305686 |
| CC | GO:0043596 | nuclear replication fork | 8 | 0.000347599 |
| CC | GO:0005680 | anaphase-promoting complex | 7 | 0.000431777 |
| CC | GO:0031248 | protein acetyltransferase complex | 14 | 0.000431777 |
| CC | GO:1902493 | acetyltransferase complex | 14 | 0.000431777 |
| CC | GO:0005671 | Ada2/Gcn5/Ada3 transcription activator complex | 6 | 0.000442487 |
| CC | GO:0031080 | nuclear pore outer ring | 5 | 0.000507089 |
| CC | GO:0000123 | histone acetyltransferase complex | 13 | 0.000538453 |
| CC | GO:0000307 | cyclin-dependent protein kinase holoenzyme complex | 8 | 0.000554153 |
| CC | GO:1990391 | DNA repair complex | 8 | 0.000554153 |
| CC | GO:0005667 | transcription factor complex | 30 | 0.000567439 |
| CC | GO:0030014 | CCR4-NOT complex | 6 | 0.000629817 |
| CC | GO:0000803 | sex chromosome | 8 | 0.000696421 |
| CC | GO:0032993 | protein-DNA complex | 23 | 0.000781589 |
| CC | GO:0005687 | U4 snRNP | 5 | 0.000801354 |
| CC | GO:1990023 | mitotic spindle midzone | 5 | 0.000801354 |
| CC | GO:0034719 | SMN-Sm protein complex | 6 | 0.000879532 |
| CC | GO:0032153 | cell division site | 11 | 0.000886755 |
| CC | GO:0032155 | cell division site part | 11 | 0.000886755 |
| CC | GO:0000118 | histone deacetylase complex | 10 | 0.000891221 |
| CC | GO:0005689 | U12-type spliceosomal complex | 7 | 0.000924697 |
| CC | GO:0061695 | transferase complex, transferring phosphorus-containing groups | 22 | 0.001179011 |
| CC | GO:1902562 | H4 histone acetyltransferase complex | 8 | 0.001288794 |
| CC | GO:0005732 | small nucleolar ribonucleoprotein complex | 7 | 0.001522962 |
| CC | GO:0090568 | nuclear transcriptional repressor complex | 7 | 0.001522962 |
| CC | GO:1990752 | microtubule end | 7 | 0.001522962 |
| CC | GO:0043073 | germ cell nucleus | 6 | 0.001588191 |
| CC | GO:0044452 | nucleolar part | 19 | 0.00187352 |
| CC | GO:0090543 | Flemming body | 7 | 0.002427571 |
| CC | GO:0032154 | cleavage furrow | 10 | 0.002581992 |
| CC | GO:0010369 | chromocenter | 5 | 0.002610464 |
| CC | GO:0090575 | RNA polymerase II transcription factor complex | 16 | 0.003856226 |
| CC | GO:0005875 | microtubule associated complex | 13 | 0.004934019 |
| CC | GO:0035371 | microtubule plus-end | 5 | 0.005071157 |
| CC | GO:0000791 | euchromatin | 7 | 0.005427515 |
| CC | GO:0000176 | nuclear exosome (RNase complex) | 4 | 0.005672242 |
| CC | GO:0000178 | exosome (RNase complex) | 6 | 0.005672242 |
| CC | GO:1905354 | exoribonuclease complex | 6 | 0.005672242 |
| CC | GO:0005881 | cytoplasmic microtubule | 10 | 0.006267961 |
| CC | GO:0001650 | fibrillar center | 16 | 0.006488443 |
| CC | GO:0005637 | nuclear inner membrane | 8 | 0.00713105 |
| CC | GO:0000930 | gamma-tubulin complex | 5 | 0.008486838 |
| CC | GO:1902554 | serine/threonine protein kinase complex | 10 | 0.008745862 |
| CC | GO:0016605 | PML body | 13 | 0.008847115 |
| CC | GO:0017053 | transcriptional repressor complex | 11 | 0.010710635 |
| CC | GO:0016580 | Sin3 complex | 4 | 0.011336048 |
| CC | GO:0070822 | Sin3-type complex | 4 | 0.011336048 |
| CC | GO:0005685 | U1 snRNP | 6 | 0.012183183 |
| CC | GO:0042575 | DNA polymerase complex | 4 | 0.015443799 |
| CC | GO:0000800 | lateral element | 4 | 0.020562879 |
| CC | GO:0031461 | cullin-RING ubiquitin ligase complex | 14 | 0.02329872 |
| CC | GO:0044815 | DNA packaging complex | 13 | 0.026051322 |
| CC | GO:0001673 | male germ cell nucleus | 4 | 0.026051322 |
| CC | GO:0005662 | DNA replication factor A complex | 4 | 0.026051322 |
| CC | GO:1902911 | protein kinase complex | 10 | 0.027618087 |
| CC | GO:0005719 | nuclear euchromatin | 5 | 0.028926411 |
| CC | GO:0000795 | synaptonemal complex | 6 | 0.030753486 |
| CC | GO:0099086 | synaptonemal structure | 6 | 0.030753486 |
| CC | GO:0035578 | azurophil granule lumen | 11 | 0.031481538 |
| CC | GO:0030992 | intraciliary transport particle B | 4 | 0.031826484 |
| CC | GO:0044232 | organelle membrane contact site | 4 | 0.048499497 |
| CC | GO:0000235 | astral microtubule | 3 | 0.048499497 |
| CC | GO:0005686 | U2 snRNP | 3 | 0.048499497 |
| CC | GO:0005818 | aster | 3 | 0.048499497 |
| CC | GO:0072687 | meiotic spindle | 3 | 0.048499497 |
| MF | GO:0008094 | DNA-dependent ATPase activity | 29 | 4.18E-15 |
| MF | GO:0140097 | catalytic activity, acting on DNA | 41 | 7.80E-15 |
| MF | GO:0003682 | chromatin binding | 71 | 2.06E-13 |
| MF | GO:0003684 | damaged DNA binding | 21 | 9.70E-10 |
| MF | GO:0003697 | single-stranded DNA binding | 25 | 2.62E-09 |
| MF | GO:0042393 | histone binding | 35 | 5.68E-09 |
| MF | GO:0042623 | ATPase activity, coupled | 38 | 5.89E-08 |
| MF | GO:0031491 | nucleosome binding | 17 | 5.89E-08 |
| MF | GO:0016887 | ATPase activity | 44 | 6.52E-08 |
| MF | GO:0043142 | single-stranded DNA-dependent ATPase activity | 9 | 7.49E-08 |
| MF | GO:0004386 | helicase activity | 27 | 1.64E-07 |
| MF | GO:0031492 | nucleosomal DNA binding | 13 | 1.64E-07 |
| MF | GO:0004003 | ATP-dependent DNA helicase activity | 13 | 2.47E-07 |
| MF | GO:0000217 | DNA secondary structure binding | 11 | 6.53E-07 |
| MF | GO:0042162 | telomeric DNA binding | 13 | 8.20E-07 |
| MF | GO:0004527 | exonuclease activity | 18 | 9.43E-07 |
| MF | GO:0003678 | DNA helicase activity | 14 | 1.59E-06 |
| MF | GO:0008026 | ATP-dependent helicase activity | 15 | 4.04E-06 |
| MF | GO:0070035 | purine NTP-dependent helicase activity | 15 | 4.04E-06 |
| MF | GO:0004518 | nuclease activity | 29 | 4.04E-06 |
| MF | GO:0061650 | ubiquitin-like protein conjugating enzyme activity | 10 | 6.20E-06 |
| MF | GO:0004536 | deoxyribonuclease activity | 13 | 7.30E-06 |
| MF | GO:0008017 | microtubule binding | 27 | 2.23E-05 |
| MF | GO:0000400 | four-way junction DNA binding | 8 | 2.49E-05 |
| MF | GO:0061631 | ubiquitin conjugating enzyme activity | 9 | 2.49E-05 |
| MF | GO:0015631 | tubulin binding | 35 | 2.49E-05 |
| MF | GO:0070182 | DNA polymerase binding | 8 | 3.97E-05 |
| MF | GO:0004520 | endodeoxyribonuclease activity | 10 | 4.10E-05 |
| MF | GO:0008187 | poly-pyrimidine tract binding | 8 | 0.000375696 |
| MF | GO:0008022 | protein C-terminus binding | 26 | 0.000458326 |
| MF | GO:0003727 | single-stranded RNA binding | 14 | 0.000504067 |
| MF | GO:0031490 | chromatin DNA binding | 15 | 0.000507006 |
| MF | GO:0016796 | exonuclease activity, active with either ribo- or deoxyribonucleic acids and producing 5'-phosphomonoesters | 11 | 0.000517883 |
| MF | GO:0043021 | ribonucleoprotein complex binding | 18 | 0.000628648 |
| MF | GO:0004519 | endonuclease activity | 17 | 0.001642433 |
| MF | GO:0030983 | mismatched DNA binding | 5 | 0.002036052 |
| MF | GO:0098505 | G-rich strand telomeric DNA binding | 5 | 0.002036052 |
| MF | GO:0008536 | Ran GTPase binding | 8 | 0.002049604 |
| MF | GO:0008408 | 3'-5' exonuclease activity | 10 | 0.002411652 |
| MF | GO:0008409 | 5'-3' exonuclease activity | 6 | 0.002576251 |
| MF | GO:0010485 | H4 histone acetyltransferase activity | 6 | 0.002576251 |
| MF | GO:0043047 | single-stranded telomeric DNA binding | 5 | 0.003107573 |
| MF | GO:0140142 | nucleocytoplasmic carrier activity | 7 | 0.003107573 |
| MF | GO:1990841 | promoter-specific chromatin binding | 10 | 0.003107573 |
| MF | GO:0044389 | ubiquitin-like protein ligase binding | 32 | 0.003107573 |
| MF | GO:0008757 | S-adenosylmethionine-dependent methyltransferase activity | 19 | 0.003704497 |
| MF | GO:0016893 | endonuclease activity, active with either ribo- or deoxyribonucleic acids and producing 5'-phosphomonoesters | 9 | 0.00377492 |
| MF | GO:0004674 | protein serine/threonine kinase activity | 38 | 0.004831289 |
| MF | GO:0031625 | ubiquitin protein ligase binding | 30 | 0.004983573 |
| MF | GO:0001047 | core promoter binding | 9 | 0.006398195 |
| MF | GO:0098847 | sequence-specific single stranded DNA binding | 5 | 0.006528393 |
| MF | GO:0008276 | protein methyltransferase activity | 13 | 0.006944566 |
| MF | GO:0018024 | histone-lysine N-methyltransferase activity | 9 | 0.007251418 |
| MF | GO:0042054 | histone methyltransferase activity | 10 | 0.007329865 |
| MF | GO:0008266 | poly(U) RNA binding | 6 | 0.007630011 |
| MF | GO:0004529 | exodeoxyribonuclease activity | 5 | 0.008232373 |
| MF | GO:0016895 | exodeoxyribonuclease activity, producing 5'-phosphomonoesters | 5 | 0.008232373 |
| MF | GO:0017056 | structural constituent of nuclear pore | 5 | 0.008232373 |
| MF | GO:0035173 | histone kinase activity | 5 | 0.008232373 |
| MF | GO:0003712 | transcription coregulator activity | 46 | 0.008232373 |
| MF | GO:0051082 | unfolded protein binding | 13 | 0.008474221 |
| MF | GO:0036002 | pre-mRNA binding | 10 | 0.008474221 |
| MF | GO:0004540 | ribonuclease activity | 14 | 0.008474221 |
| MF | GO:0000979 | RNA polymerase II core promoter sequence-specific DNA binding | 6 | 0.008474221 |
| MF | GO:0070034 | telomerase RNA binding | 6 | 0.008474221 |
| MF | GO:0070717 | poly-purine tract binding | 6 | 0.008474221 |
| MF | GO:0045296 | cadherin binding | 31 | 0.00849939 |
| MF | GO:0001103 | RNA polymerase II repressing transcription factor binding | 7 | 0.00931487 |
| MF | GO:0097472 | cyclin-dependent protein kinase activity | 5 | 0.010228261 |
| MF | GO:0016741 | transferase activity, transferring one-carbon groups | 23 | 0.010510265 |
| MF | GO:0035064 | methylated histone binding | 11 | 0.010510265 |
| MF | GO:0140034 | methylation-dependent protein binding | 11 | 0.010510265 |
| MF | GO:0016279 | protein-lysine N-methyltransferase activity | 10 | 0.011427247 |
| MF | GO:0008168 | methyltransferase activity | 22 | 0.011802408 |
| MF | GO:0016278 | lysine N-methyltransferase activity | 10 | 0.012705634 |
| MF | GO:0016891 | endoribonuclease activity, producing 5'-phosphomonoesters | 7 | 0.012705634 |
| MF | GO:0140030 | modification-dependent protein binding | 17 | 0.014745387 |
| MF | GO:0001046 | core promoter sequence-specific DNA binding | 7 | 0.014883875 |
| MF | GO:0034061 | DNA polymerase activity | 7 | 0.014883875 |
| MF | GO:0042826 | histone deacetylase binding | 14 | 0.015496932 |
| MF | GO:0032404 | mismatch repair complex binding | 4 | 0.019678411 |
| MF | GO:0016538 | cyclin-dependent protein serine/threonine kinase regulator activity | 5 | 0.021274178 |
| MF | GO:0140098 | catalytic activity, acting on RNA | 27 | 0.023506568 |
| MF | GO:0051539 | 4 iron, 4 sulfur cluster binding | 7 | 0.024084288 |
| MF | GO:0031072 | heat shock protein binding | 14 | 0.024987166 |
| MF | GO:0005092 | GDP-dissociation inhibitor activity | 4 | 0.026551523 |
| MF | GO:0003713 | transcription coactivator activity | 28 | 0.027127829 |
| MF | GO:0140104 | molecular carrier activity | 7 | 0.027154924 |
| MF | GO:0003730 | mRNA 3'-UTR binding | 10 | 0.031887233 |
| MF | GO:0030515 | snoRNA binding | 5 | 0.031887233 |
| MF | GO:0005521 | lamin binding | 4 | 0.034618816 |
| MF | GO:0000175 | 3'-5'-exoribonuclease activity | 6 | 0.035978029 |
| MF | GO:0003887 | DNA-directed DNA polymerase activity | 5 | 0.038622566 |
| MF | GO:0004693 | cyclin-dependent protein serine/threonine kinase activity | 4 | 0.044819024 |
| MF | GO:0016896 | exoribonuclease activity, producing 5'-phosphomonoesters | 6 | 0.04900097 |

Note: GO, gene ontology.
